# Supplementary material
Source: PubMed Central journal article supplement (PMC2867324)
Supplement: supp_137.11.1919_043588FigS1.pdf [file supp_137.11.1919_043588FigS1.pdf]

Brightfield

GFP Fluorescence

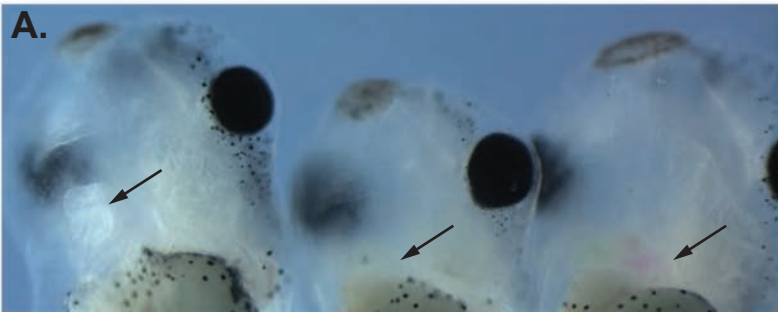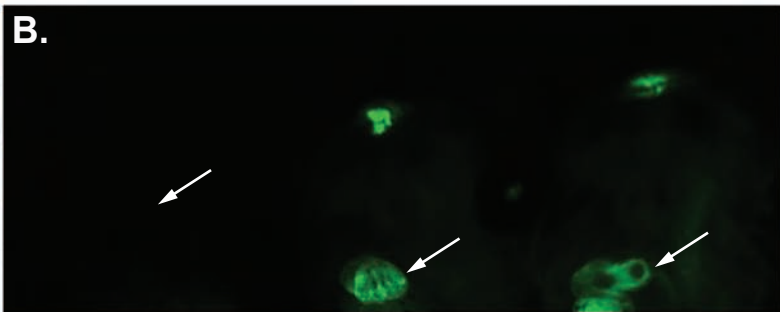

Non-transgenic

Transgenic

Transgenic

Non-transgenic

Transgenic

Transgenic
