# Supplementary material
Source: PubMed Central journal article supplement (PMC2867324)
Supplement: supp_137.11.1919_DEV043588SuppTables.pdf [file supp_137.11.1919_DEV043588SuppTables.pdf]

**Table S1. Primers used for isolation and cloning of *Tbx20*, and the generation of *Tbx20*-EGFP transgenic constructs**

| Primer description                                                 | Primer sequence                              |
|--------------------------------------------------------------------|----------------------------------------------|
| <i>X. laevis</i> <i>Tbx20</i> exon1/forward (for BAC screen probe) | 5'-CCA CTG TCA CAG CTC GAA CAT AGA-3'        |
| <i>X. laevis</i> <i>Tbx20</i> exon1/reverse (for BAC screen probe) | 5'-CCT TGG GTG TCC CAC TTG ACA TTA-3'        |
| <i>Tbx20</i> 5' deletions (-1969)/forward                          | 5'-CGC CGA ATT CAT GAC ACT TAC CAG ATA TG-3' |
| <i>Tbx20</i> 5' deletions (-1483)/forward                          | 5'-CGC CGA ATT CTG TAT TTA GCG CAC CTA-3'    |
| <i>Tbx20</i> 5' deletions (-944)/forward                           | 5'-CGC CGA ATT CCC GTG AGG GGC AGT CAA-3'    |
| <i>Tbx20</i> 5' deletions (-334)/forward                           | 5'-CGC CGA ATT CCT GCC CTA TTT GAT CAG C-3'  |
| <i>Tbx20</i> 5' deletions 3' end/reverse                           | 5'-CGG TGG ATC CAC TTC CAT-3'                |
| <i>Tbx20</i> (-251)/forward 5' end                                 | 5'-CTT CTC TTA TGT CAC GTG TGC-3'            |
| <i>Tbx20</i> (-81)/forward 5' end                                  | 5'-GTG ACG CTG CAG GGC TCC-3'                |
| <i>Tbx20</i> (-251/-81)/reverse 3' end                             | 5'-CCG GTG GAT CCA CTT CCA TG-3'             |
| <i>Tbx20</i> elimination of 334 bp element/forward                 | 5'-CCG AAT TCT CAT AAA GCA GCT TATG-3'       |
| <i>Tbx20</i> elimination of 334 bp element/reverse                 | 5'-GTG GAT CCG ATA TTT TAA TAA ATA AAC-3'    |

**Table S2. PCR primers used in 5' RLM-RACE**

| Primer description                                        | Primer sequence                       |
|-----------------------------------------------------------|---------------------------------------|
| <i>X. tropicalis</i> <i>Tbx20</i> -specific 5' primer     | 5'-AGC AGC TTA TGG TAG GGT TTC T-3'   |
| <i>X. tropicalis</i> <i>Tbx20</i> 5' RLM-RACE inner       | 5'-CTT TCA GCA TTC ACA CGC TTC A-3'   |
| <i>X. tropicalis</i> <i>Tbx20</i> 5' RLM-RACE outer       | 5'-TGT ACT CAT TCC CGA CAG CGT-3'     |
| <i>X. tropicalis</i> <i>Tbx20</i> -specific 5' primer (2) | 5'-ACT GTC AGA GCT CCA ACC TAG ACT-3' |
| <i>X. tropicalis</i> <i>Tbx20</i> 5' RLM-RACE inner (2)   | 5'-AGA GGG TGT GTA TTC CAT GCT GGA-3' |
| <i>X. tropicalis</i> <i>Tbx20</i> 5' RLM-RACE outer (2)   | 5'-TGC TCT CCT GTG TCT CTT TGT CCA-3' |

**Table S3. ChIP primer sequences**

| ChIP primer                      | Primer sequence                         |
|----------------------------------|-----------------------------------------|
| <i>Xnr6</i> inner/forward        | 5'-GGT AGA TGA AAG GCT GAC AGG TGT G-3' |
| <i>Xnr6</i> inner/reverse        | 5'-GGC TGT TGA AAA CTG AAA TGA AGC-3'   |
| SMAD1 sites/forward              | 5'-TTT CTC TCG GAG CCG AGT GA-3'        |
| SMAD1 sites/reverse              | 5'-GCT GAT AAG TGT CTG GGA GG-3'        |
| Non-canonical SMAD1 site/forward | 5'-ATA GGA TCT GTG TGG CCA TG-3'        |
| Non-canonical SMAD1 site/reverse | 5'-CTG ACA GTG GCC AGG AGA TT-3'        |

**Table S4. Dissociation constants ( $K_d$ ), standard deviation and nucleotide sequence for each oligonucleotide analyzed in fluorescence polarization studies**

| Oligonucleotide | $K_d$ (mM) | Standard deviation | Oligonucleotide sequence                       |
|-----------------|------------|--------------------|------------------------------------------------|
| xVent           | 7.829      | 0.7465             | AGAGAGAATGTTTAGCATAACAATAGC                    |
| SRF site        | 13.59      | 0.6407             | AGCTTCTTTACACAGGATGTCCATATTAGGACATCTGCGTCAGCAA |
| Oligo 20        | 6.535      | 0.2181             | CTATTTGATCAGCAAACGAGATGGATTACA                 |
| Oligo 21        | 8.512      | 0.3635             | ACGAGATGGATTACAGATGAGCATCCTTAG                 |
| Oligo 19*       | 3.758      | 0.2244             | GATGAGCATCCTTAGATTACTCTAAAAGCC                 |
| Oligo 18        | 9.539      | 0.4817             | ATTACTCTAAAAGCCCCGCCCTTCTCTTAT                 |
| Oligo 17        | 5.631      | 0.4146             | CCGCCCTTCTTATGTACAGTGTGCTTTT                   |
| Oligo 16*       | 2.848      | 0.08203            | GTACAGTGTGCTTTTTTTTAGTAAGTCTTT                 |
| Oligo 15        | 8.428      | 0.1427             | TTTTAGTAAGTCTTTTTCTCTCGGAGCCCA                 |
| Oligo 14        | 9.473      | 0.7696             | TTCTCTCGGAGCCAGTGAGAAAAAGAAGT                  |
| Oligo 13*       | 3.56       | 0.19               | GTGAGAAAAAGAAGTAGCTCGGCTGATCCT                 |
| Oligo 12        | 9.128      | 1.409              | AGCTCGGCTGATCCTATCTGGCCCTGCTCC                 |
| Oligo 11        | 6.382      | 0.6181             | ATCTGGCCCTGCTCCATCCCTGCTGCCCTT                 |
| Oligo 10        | 5.97       | 0.598              | ATCCCTGCTGCCCTTATTCTGCTGTG                     |
| Oligo 9*        | 2.836      | 0.3847             | CATTCATTGCTGTGCTCCAGCCGCCACCT                  |
| Oligo 8*        | 2.078      | 0.2239             | CTCCAGCCGCCACCTCCAGACACTTATCA                  |
| Oligo 7         | 5.566      | 0.4806             | CCCAGACACTTATCAGCTGTATCAGGCAGA                 |
| Oligo 6*        | 2.402      | 0.1846             | GCTGTATCAGGCAGATGTGACGCTGAGGG                  |
| Oligo 5         | 7.201      | 0.5312             | TGTGACGCTGCAGGGCTCCAATTGCCAGG                  |
| Oligo 4         | 8.436      | 0.3279             | CTCCAATTGCCAGGAGAGATAGGATCT                    |
| Oligo 3         | 10.03      | 0.4913             | AGAGAGATAGGATCTGTGTGGCCATGAAAT                 |
| Oligo 2*        | 3.106      | 0.1021             | GTGTGGCCATGAAATTAAGGAAGCAGAGGC                 |
| Oligo 1         | 14.03      | 1.1                | TAAGGAAGCAGAGGCTGAGAAATGGGAACAG                |

\*Oligonucleotides bound by SMAD1.
