# Supplementary material
Source: PubMed Central journal article supplement (PMC2867324)

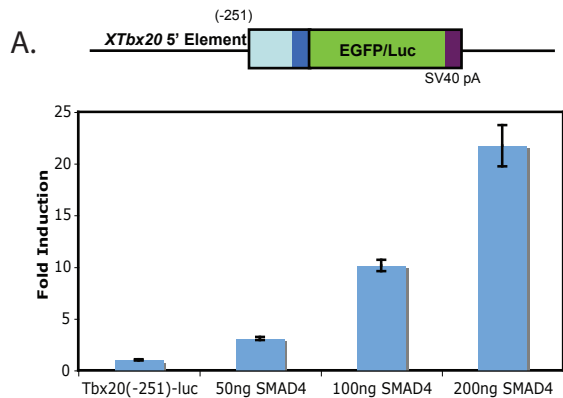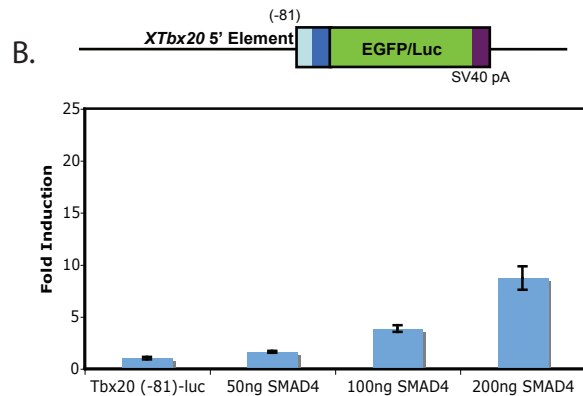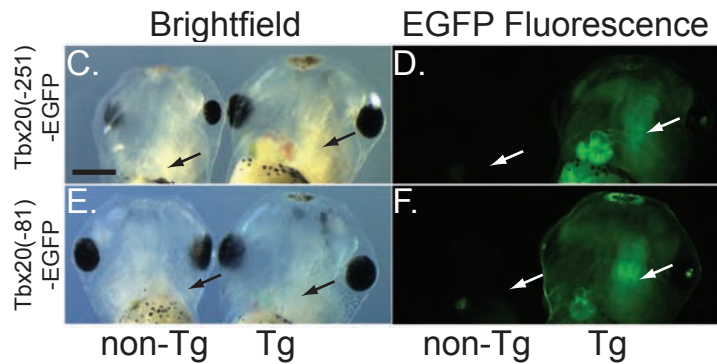

Supplement: supp_137.11.1919_043588FigS2.pdf [file supp_137.11.1919_043588FigS2.pdf]

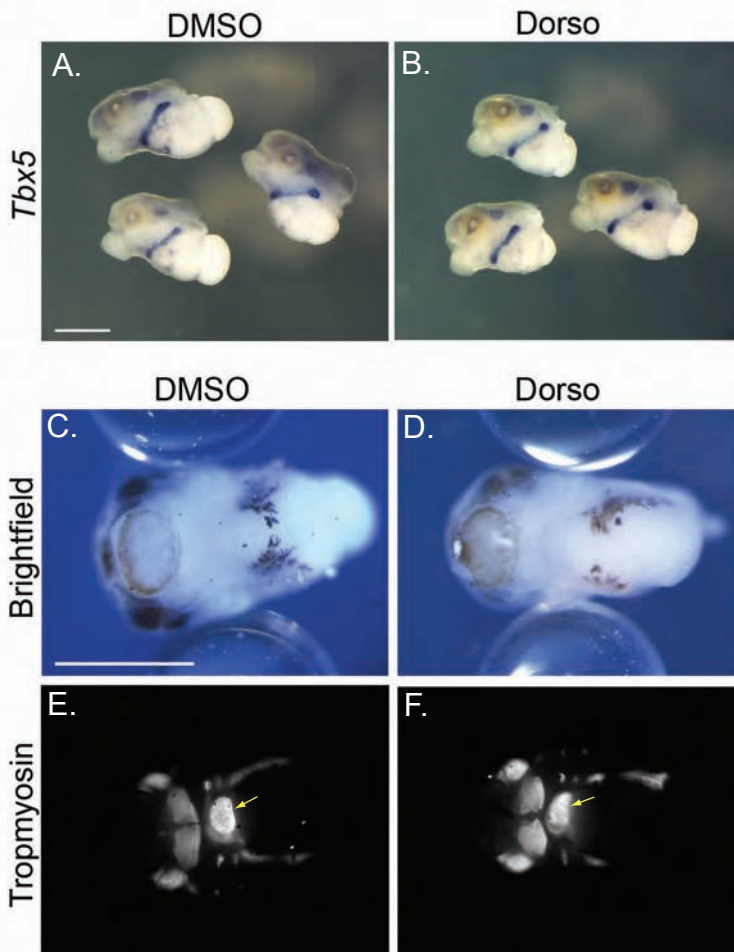

Supplement: supp_137.11.1919_043588FigS3.pdf [file supp_137.11.1919_043588FigS3.pdf]
